# Supplementary material for: Six-Month Impairment in Cognition, Mental Health, and Physical Function Following COVID-19–Associated Respiratory Failure
Source: PubMed Central journal article supplement — Crit Care Explor. 2022 Mar 28;4(4):e0673. doi: 10.1097/CCE.0000000000000673 (PMC8963828; doi:10.1097/cce.0000000000000673), 2022-03-28
Supplement: cc9-4-e0673-s001.pdf [file cc9-4-e0673-s001.pdf]

| <b>Characteristics</b>                                   | <b>Overall<br/>N=60</b> | <b>No PICS<br/>N=12/60</b> | <b>One PICS<br/>Domain<br/>Impaired<br/>N=20/60</b> | <b>Two or<br/>Three PICS<br/>Domains<br/>Impaired<br/>N=28/60</b> | <b>Mental<br/>Health<br/>Impairment<br/>N=30/60</b> | <b>Cognitive<br/>Impairment<br/>N=25/60</b> | <b>Physical<br/>Functional<br/>Impairment<br/>N=33/60</b> | <b>Dyspnea<br/>N=25/40</b> |
|----------------------------------------------------------|-------------------------|----------------------------|-----------------------------------------------------|-------------------------------------------------------------------|-----------------------------------------------------|---------------------------------------------|-----------------------------------------------------------|----------------------------|
| Enrollment site — no. (%)                                |                         |                            |                                                     |                                                                   |                                                     |                                             |                                                           |                            |
| Beth Israel Deaconess Medical Center                     | 40/60 (67)              | 8/12 (67)                  | 15/20 (75)                                          | 17/28 (61)                                                        | 19/30 (63)                                          | 17/25 (68)                                  | 20/33 (60)                                                | 25/25 (100)                |
| Penn Medicine                                            | 20/60 (33)              | 4/12 (33)                  | 5/20 (25)                                           | 11/28 (39)                                                        | 11/30 (37)                                          | 8/25 (32)                                   | 13/33 (40)                                                | 0/25 (0)                   |
| Admission location — no. (%)                             |                         |                            |                                                     |                                                                   |                                                     |                                             |                                                           |                            |
| Home                                                     | 52/60 (87)              | 12/12 (100)                | 17/20 (85)                                          | 23/28 (82)                                                        | 23/30 (77)                                          | 19/25 (76)                                  | 27/33 (82)                                                | 21/25 (84)                 |
| Nursing facility                                         | 8/60 (13)               | 0 (100)                    | 3/20 (15)                                           | 5/28 (18)                                                         | 6/30 (20)                                           | 6/25 (24)                                   | 6/33 (18)                                                 | 4/25 (16)                  |
| Mean timing of follow-up after hospital discharge – days | 182±15                  | 175±14                     | 189±20                                              | 174±16                                                            | 185±17                                              | 178±15                                      | 184±19                                                    | 179±20                     |
| Mean age (range) – y                                     | 59±13 (24-88)           | 43±12 (24- 59)             | 58±14 (32-77)                                       | 63±15 (35-88)                                                     | 57±13 (32-78)                                       | 58±16 (35-88)                               | 65±15 (35-88)                                             | 57±14 (26-88)              |
| Sex — no. (%)                                            |                         |                            |                                                     |                                                                   |                                                     |                                             |                                                           |                            |
| Male                                                     | 29/60 (48)              | 7/12 (42)                  | 10/20 (50)                                          | 12/28 (43)                                                        | 15/30 (50)                                          | 13/25 (52)                                  | 16/33 (48)                                                | 11/25 (44)                 |
| Female                                                   | 31/60 (52)              | 5/12 (58)                  | 10/20 (50)                                          | 15/28 (54)                                                        | 15/30 (50)                                          | 12/25 (48)                                  | 17/33 (52)                                                | 14/25 (56)                 |
| Race/Ethnicity* – no. (%)                                |                         |                            |                                                     |                                                                   |                                                     |                                             |                                                           |                            |
| Asian                                                    | 6/60 (10)               | 0/12 (0)                   | 2/20 (10)                                           | 4/28 (14)                                                         | 3/30 (10)                                           | 3/25 (12)                                   | 2/33 (6)                                                  | 2/25 (8)                   |
| Black                                                    | 12/60 (20)              | 3/12 (25)                  | 5/20 (25)                                           | 4/28 (14)                                                         | 6/30 (20)                                           | 5/25 (20)                                   | 4/33 (12)                                                 | 5/25 (20)                  |
| Hispanic                                                 | 26/60 (43)              | 5/12 (42)                  | 9/20 (45)                                           | 12/28 (43)                                                        | 14/30 (47)                                          | 10/25 (40)                                  | 14/33 (42)                                                | 11/25 (44)                 |
| White, Non-Hispanic                                      | 16/60 (27)              | 4/12 (33)                  | 4/20 (20)                                           | 8/28 (29)                                                         | 7/30 (23)                                           | 7/25 (28)                                   | 9/33 (27)                                                 | 7/25 (28)                  |

|                                                         |            |           |            |            |            |            |            |            |
|---------------------------------------------------------|------------|-----------|------------|------------|------------|------------|------------|------------|
| Coexisting conditions<br>— no. (%)                      |            |           |            |            |            |            |            |            |
| Anxiety                                                 | 3/60 (5)   | 0/12 (0)  | 1/20 (5)   | 2/28 (7)   | 3/30 (10)  | 1/25 (4)   | 1/33 (3)   | 1/25 (4)   |
| Chronic kidney disease                                  | 6/60 (10)  | 1/12 (8)  | 2/20 (10)  | 3/28 (11)  | 1/30 (3)   | 3/25 (12)  | 3/33 (9)   | 1/25 (4)   |
| Chronic obstructive pulmonary disease                   | 7/60 (12)  | 2/12 (17) | 3/20 (15)  | 2/28 (7)   | 3/30 (10)  | 3/25 (12)  | 4/33 (12)  | 7/25 (28)  |
| Coronary Artery Disease                                 | 11/60 (18) | 2/12 (17) | 5/20 (25)  | 4/28 (14)  | 5/30 (17)  | 4/25 (16)  | 6/33 (18)  | 6/25 (24)  |
| Current tobacco smoker                                  | 11/60 (18) | 2/12 (17) | 5/20 (25)  | 4/28 (14)  | 5/30 (17)  | 5/25 (20)  | 5/33 (15)  | 7/25 (28)  |
| Dementia                                                | 1/60 (2)   | 0/12 (0)  | 0 (0)      | 1/28 (4)   | 0/30 (0)   | 1/25 (4)   | 1/33 (3)   | 0/25 (0)   |
| Diabetes mellitus                                       | 16/60 (27) | 2/12 (17) | 7/20 (35)  | 7/28 (25)  | 8/30 (27)  | 9/25 (36)  | 10/33 (30) | 9/25 (36)  |
| Hypertension                                            | 17/60 (28) | 4/12 (33) | 7/20 (35)  | 6/28 (21)  | 7/30 (23)  | 10/25 (40) | 7/33 (21)  | 7/25 (28)  |
| Obstructive Sleep Apnea                                 | 9/60 (15)  | 2/12 (17) | 3/20 (15)  | 4/28 (14)  | 4/30 (13)  | 3/25 (12)  | 4/33 (12)  | 3/25 (12)  |
| Pregnancy                                               | 1/60 (2)   | 1/12 (8)  | 0/20 (0)   | 0/28 (0)   | 0/30 (0)   | 0/25 (0)   | 0/33 (0)   | 0/25 (0)   |
| Depression                                              | 4/60 (7)   | 0/12 (0)  | 0/20 (0)   | 4/28 (14)  | 4/30 (13)  | 3/25 (12)  | 4/33 (12)  | 3/25 (12)  |
| Delirium in ICU**                                       | 39/60 (65) | 5/12 (42) | 15/20 (75) | 19/28 (68) | 17/30 (57) | 24/25 (96) | 23/33 (70) | 18/25 (72) |
| Delirium day of ICU Discharge                           | 12/60 (20) | 3/12 (25) | 3/20 (15)  | 6/28 (21)  | 6/30 (20)  | 8/25 (32)  | 6/33 (19)  | 7/25 (28)  |
| Mean Duration of Invasive Mechanical Ventilation – days | 14±6.5     | 12.2±5.2  | 13.4±7     | 15.6±7.3   | 14.3±6.1   | 15.6±5.1   | 15±6.3     | 14.5±5.2   |
| Mean Length of Hospital Stay – days                     | 23.5±8.6   | 21.1±9.1  | 24.4±9     | 25±8.5     | 24.2±8.1   | 25.2±7.4   | 24.2±10.2  | 23.7±8.5   |
| Mean SOFA score at intubation                           | 5±1        | 4±2       | 5±1        | 5±2        | 4±2        | 5±2        | 4±2        | 5±1        |
| Mean PaO <sub>2</sub> :FiO <sub>2</sub> at intubation   | 164±42     | 156±38    | 168±50     | 149±39     | 167±29     | 152±14     | 162±40     | 148±38     |
| Medications in ICU – no (%)                             |            |           |            |            |            |            |            |            |

|                                                         |                |                |                |             |             |             |             |             |
|---------------------------------------------------------|----------------|----------------|----------------|-------------|-------------|-------------|-------------|-------------|
| Antipsychotics                                          | 10/60<br>(17)  | 2/12 (25)      | 3/20 (15)      | 5/28 (18)   | 6/30 (20)   | 7/25 (28)   | 5/33 (15)   | 4/25 (16)   |
| Benzodiazepines                                         | 14/60<br>(23)  | 3/12 (25)      | 5/20 (25)      | 6/28 (21)   | 8/30 (27)   | 9/25 (36)   | 10/33 (30)  | 7/25 (28)   |
| Opioids                                                 | 60/60<br>(100) | 12/12<br>(100) | 20/20<br>(100) | 28/28 (100) | 30/30 (100) | 25/25 (100) | 33/33 (100) | 25/25 (100) |
| Neuromuscular<br>Blockade                               | 17/60<br>(28)  | 3/12 (25)      | 6/20 (30)      | 8/28 (29)   | 8/30 (27)   | 7/25 (28)   | 9/33 (27)   | 6/25 (24)   |
| Corticosteroids                                         | 0/60 (0)       | 0/12 (0)       | 0/20 (0)       | 0/28 (0)    | 0/30 (0)    | 0/25 (0)    | 0/33 (0)    | 0/25 (0)    |
| Tracheostomy – no<br>(%)                                | 6/60 (10)      | 0/12 (0)       | 1/20 (5)       | 5/28 (18)   | 3/30 (10)   | 4/25 (16)   | 6/33 (18)   | 6/25 (24)   |
| ECMO – no (%)                                           | 2/60 (3)       | 0/12 (0)       | 0/20 (0)       | 2/28 (7)    | 1/30 (3)    | 1/25 (4)    | 2/33 (6)    | 2/25 (8)    |
| Discharge disposition<br>– no (%)                       |                |                |                |             |             |             |             |             |
| Home                                                    | 33/60<br>(55)  | 9/12 (75)      | 11/20 (55)     | 13/28 (46)  | 14/30 (47)  | 10/25 (40)  | 15/33 (45)  | 11/25 (44)  |
| Nursing/post-<br>acute<br>rehabilitation<br>facility*** | 27/60<br>(45)  | 3/12 (25)      | 9/20 (45)      | 15/28 (54)  | 16/30 (53)  | 15/25 (60)  | 18/33 (55)  | 14/25 (56)  |
| 30-day hospital<br>readmission                          | 1/60 (2)       | 0/12 (0)       | 0 (0)          | 1/28 (4)    | 0/30 (0)    | 1/25 (4)    | 1/33 (3)    | 1/25 (4)    |

\*patient self-identified race at hospital admission

\*\*Delirium was assessed by confusion assessment method – ICU (CAM-ICU)

performed twice daily as routine nursing care

\*\*\*including skilled-nursing facility, acute rehab facility, and long-term acute care

hospital
